# Supplementary material for: Dasatinib versus Imatinib in Newly Diagnosed Chronic-Phase Chronic Myeloid Leukemia
Source: Atypon-hosted journal article supplement (doi:10.1056/nejmoa1002315), 2010-06-06
Supplement: nejm_kantarjian_2260sa1.pdf [file nejm_kantarjian_2260sa1.pdf]

## Supplementary Appendix

This appendix has been provided by the authors to give readers additional information about their work.

Supplement to: Kantarjian H, Shah NP, Hochhaus A, et al. Dasatinib versus imatinib in newly diagnosed chronic-phase chronic myeloid leukemia. *N Engl J Med* 2010;362:2260-70. DOI: 10.1056/NEJMoa1002315.

| <b>Supplemental Table 1. Criteria for dose modifications and treatment interruptions</b>                                                                                                                    |                                                                                                                                                                                                                                                                                                                                                                                                                                                                                                                                                                                                                                                                                                                                                                                |
|-------------------------------------------------------------------------------------------------------------------------------------------------------------------------------------------------------------|--------------------------------------------------------------------------------------------------------------------------------------------------------------------------------------------------------------------------------------------------------------------------------------------------------------------------------------------------------------------------------------------------------------------------------------------------------------------------------------------------------------------------------------------------------------------------------------------------------------------------------------------------------------------------------------------------------------------------------------------------------------------------------|
|                                                                                                                                                                                                             | <b>Criteria (Any)</b>                                                                                                                                                                                                                                                                                                                                                                                                                                                                                                                                                                                                                                                                                                                                                          |
| <p><b>- Treatment interruption</b></p> <p><b>- Dasatinib dose reduction stepwise to 80 mg/day , then to 50 mg/day</b></p> <p><b>- Imatinib dose reduction stepwise to 300 mg/mg, then to 200 mg/day</b></p> | <ul style="list-style-type: none"> <li>• Treatment-related non-hematologic toxicity <math>\geq</math> grade 2 as per specified protocol criteria</li> <li>• <math>\geq</math> grade 3 neutropenia or thrombocytopenia (except for a platelet count <math>&lt; 50 \times 10^9/L</math> in patients on an anti-coagulant treatment)</li> <li>• Febrile neutropenia (<math>\geq</math> grade 3 neutropenia with temperature <math>\geq 38.5^{\circ}C</math>)</li> <li>• Liver function abnormalities (Bilirubin <math>&gt; 3x</math> institutional upper limit of normal (ULN), aspartate/alanine aminotransferases (AST/ALT) <math>&gt; 5x</math> institutional ULN)</li> <li>• Bleeding of any grade at any site (except for <math>\geq 3</math> anemia/lymphopenia)</li> </ul> |
|                                                                                                                                                                                                             | <ul style="list-style-type: none"> <li>• No complete hematologic response (CHR, defined as <math>10 \times 10^9/L</math> white blood cells or less, less than <math>450 \times 10^9/L</math>)</li> </ul>                                                                                                                                                                                                                                                                                                                                                                                                                                                                                                                                                                       |

|                                                                                                                    |                                                                                                                                                                                                                                                                                                                                                                                                                                                                                                                                                                                                                        |
|--------------------------------------------------------------------------------------------------------------------|------------------------------------------------------------------------------------------------------------------------------------------------------------------------------------------------------------------------------------------------------------------------------------------------------------------------------------------------------------------------------------------------------------------------------------------------------------------------------------------------------------------------------------------------------------------------------------------------------------------------|
| <p><b>- Dasatinib dose escalation to 140 mg/day</b></p> <p><b>- Imatinib dose escalation to 600-800 mg/day</b></p> | <p>platelets, less than 5% basophils, no blasts or promyelocytes, less than 5% myelocytes plus metamyelocytes, and no extramedullary involvement ) within 3 months</p> <ul style="list-style-type: none"><li>• No major cytogenetic response (MCyR, defined as reduction in Ph positive cells to less than 35% in bone marrow) within 6 months</li><li>• No complete cytogenetic response (CCyR, absence of Ph positive cells in bone marrow) within 12 months</li><li>• No major molecular response (MMR, defined as BCR-ABL transcript level of 0.1% or lower on the International Scale) within 18 months</li></ul> |
|--------------------------------------------------------------------------------------------------------------------|------------------------------------------------------------------------------------------------------------------------------------------------------------------------------------------------------------------------------------------------------------------------------------------------------------------------------------------------------------------------------------------------------------------------------------------------------------------------------------------------------------------------------------------------------------------------------------------------------------------------|
